# Supplementary material for: Electrode montage-dependent intracranial variability in electric fields induced by cerebellar transcranial direct current stimulation
Source: PubMed Central journal article supplement (PMC8589967; doi:10.1038/s41598-021-01755-9), 2021-11-12

Figure S 1. Electric field distributions for the four conventional montages tested in Experiment 1.

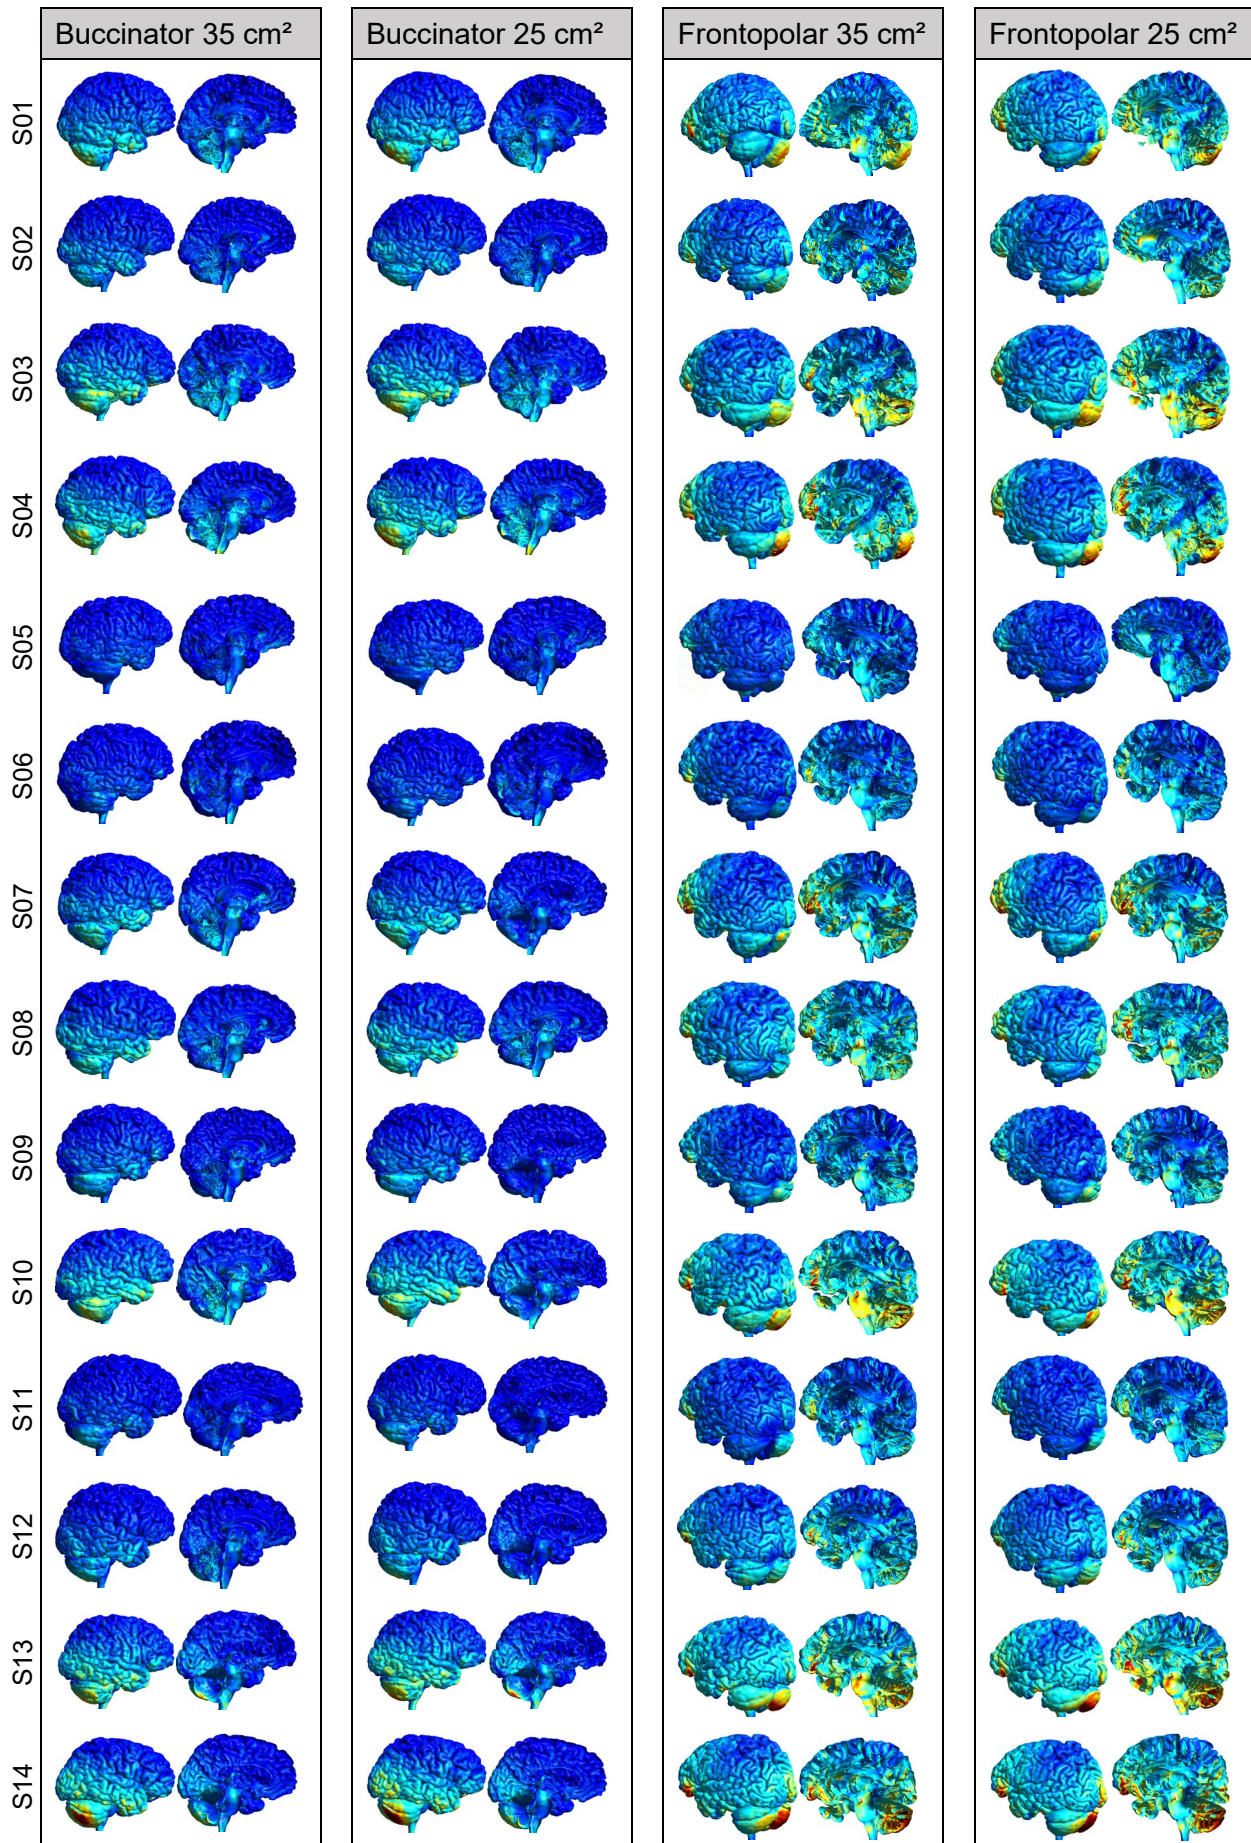

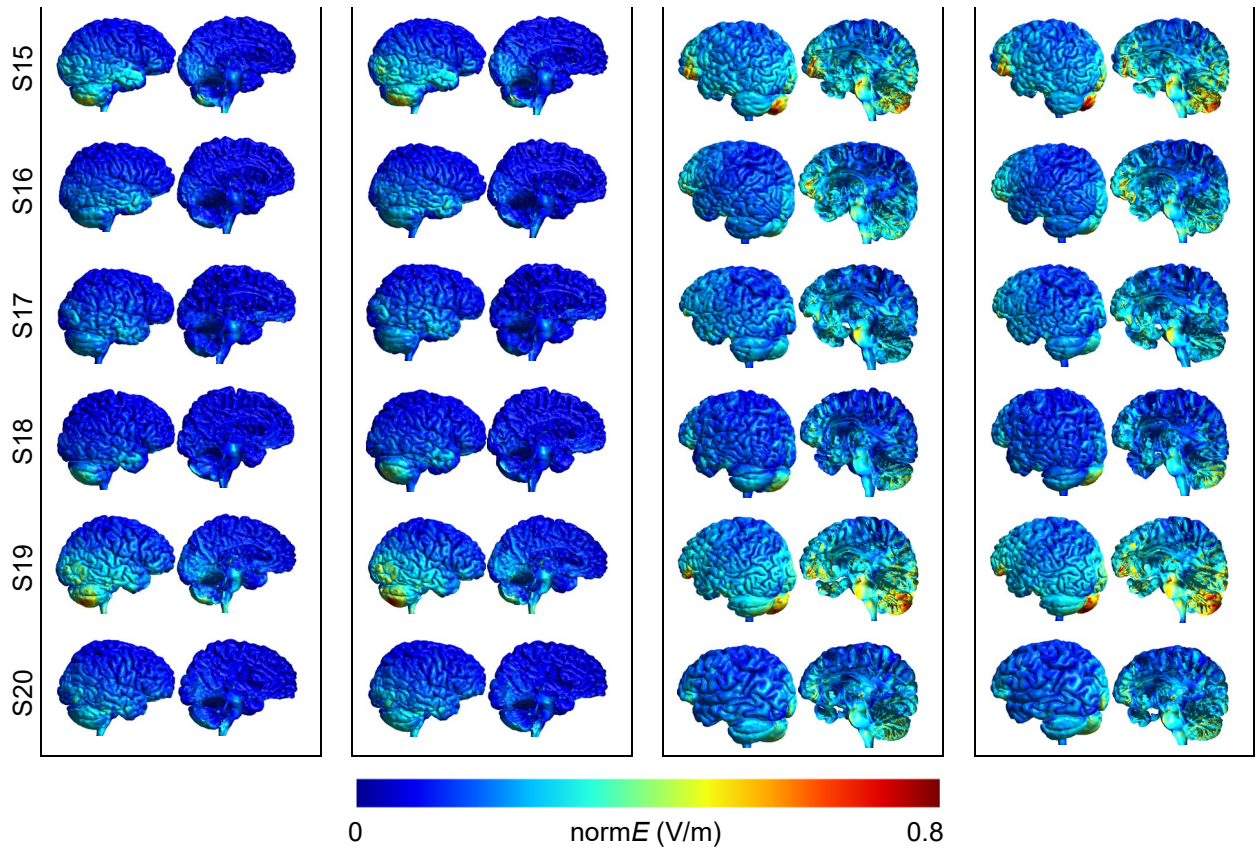

Figure S 2. Electric field directions for the four conventional montages tested in Experiment 1.

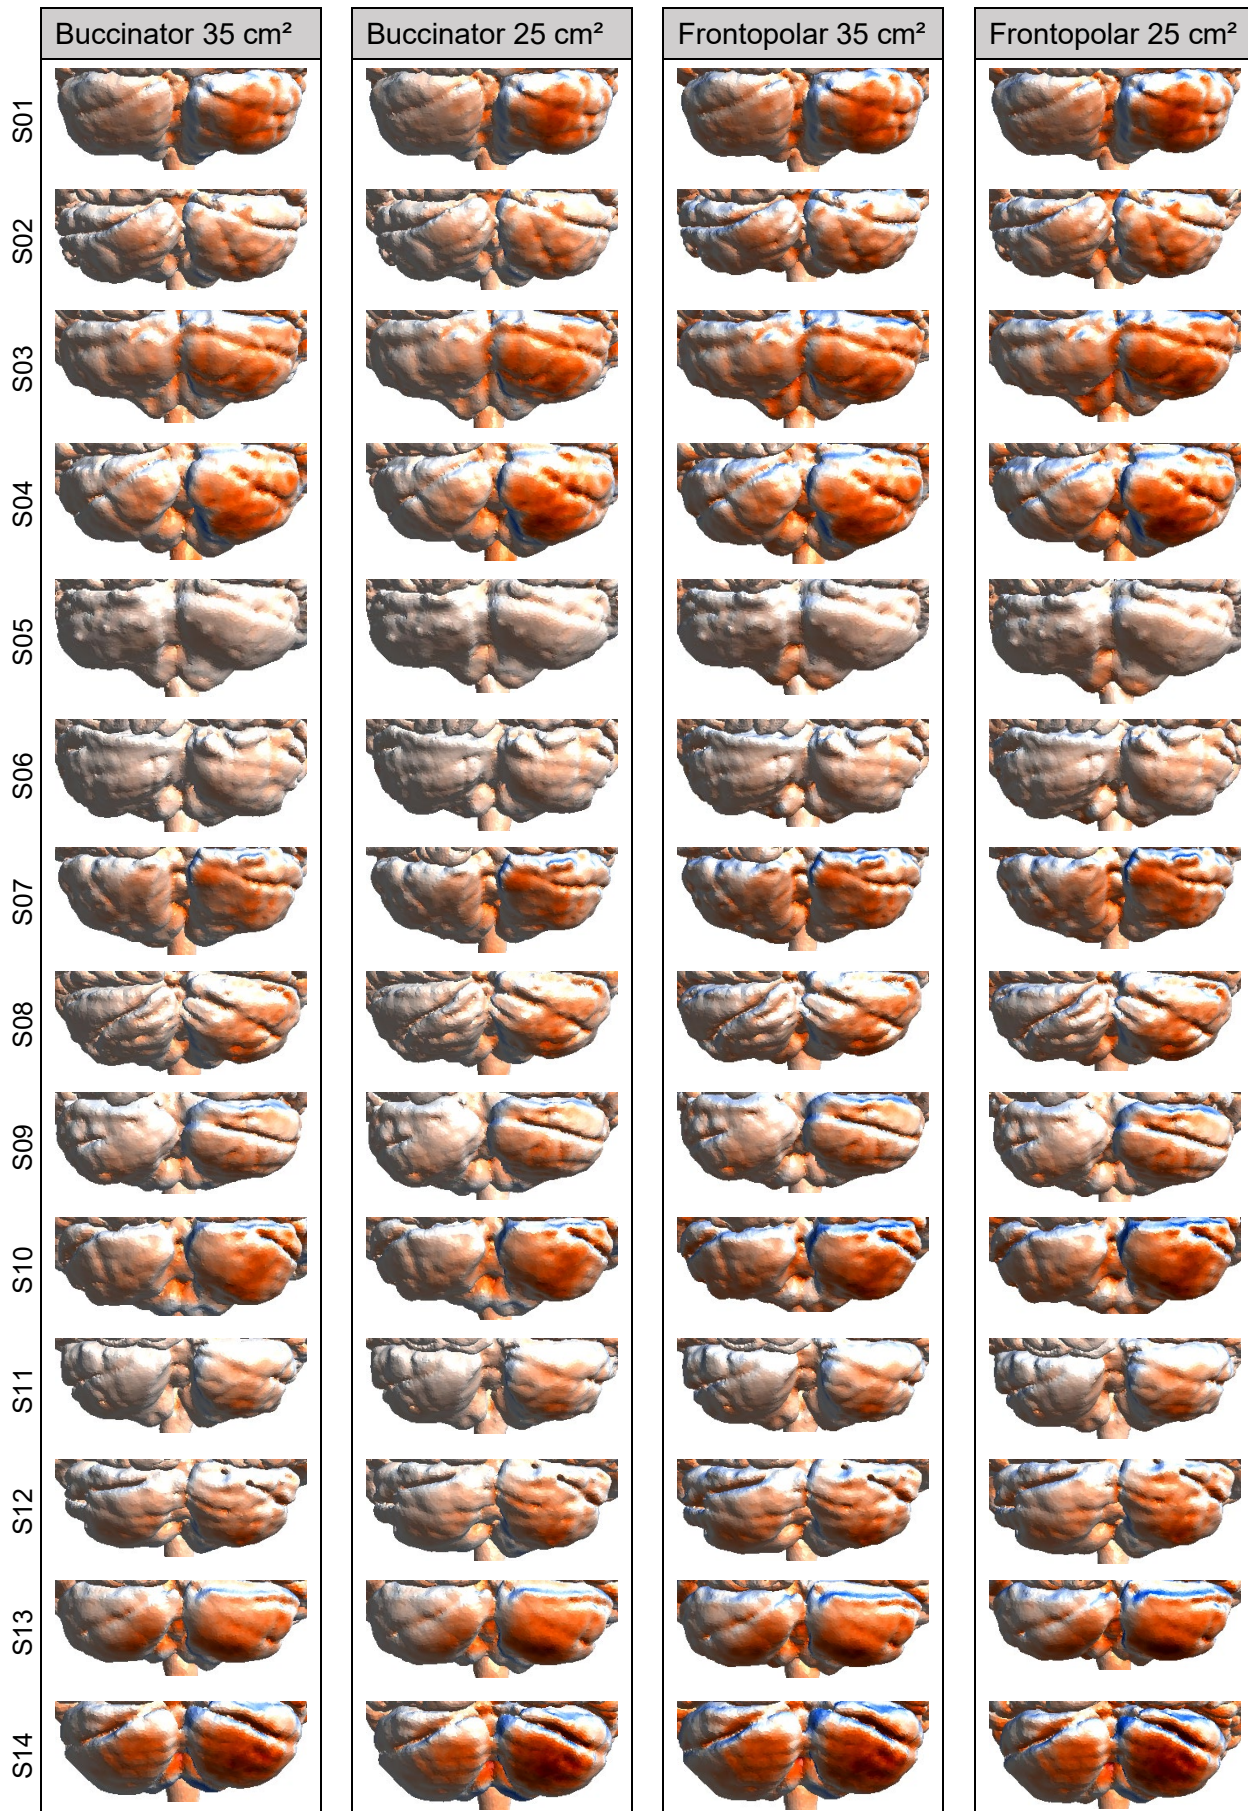

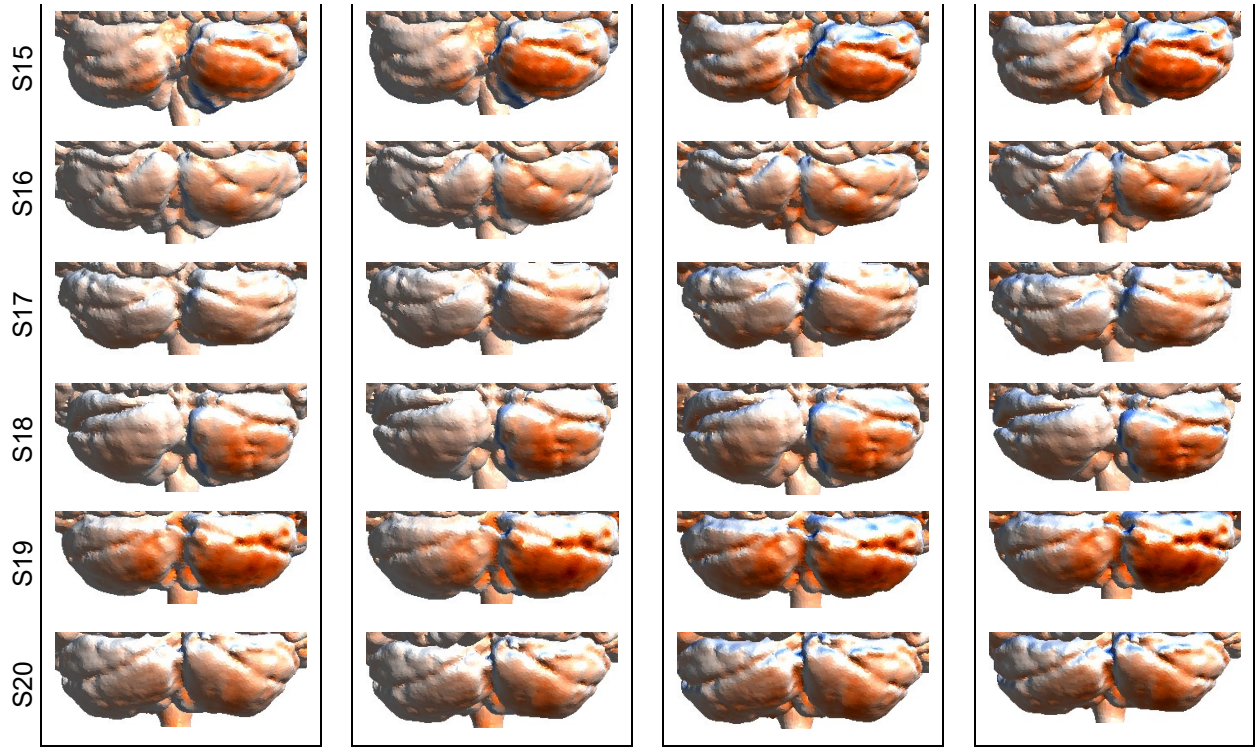

-0.4 normal  $E$  (V/m) 0.4

Figure S 3. Electric field distributions for the six alternative montages tested in Experiment 2.

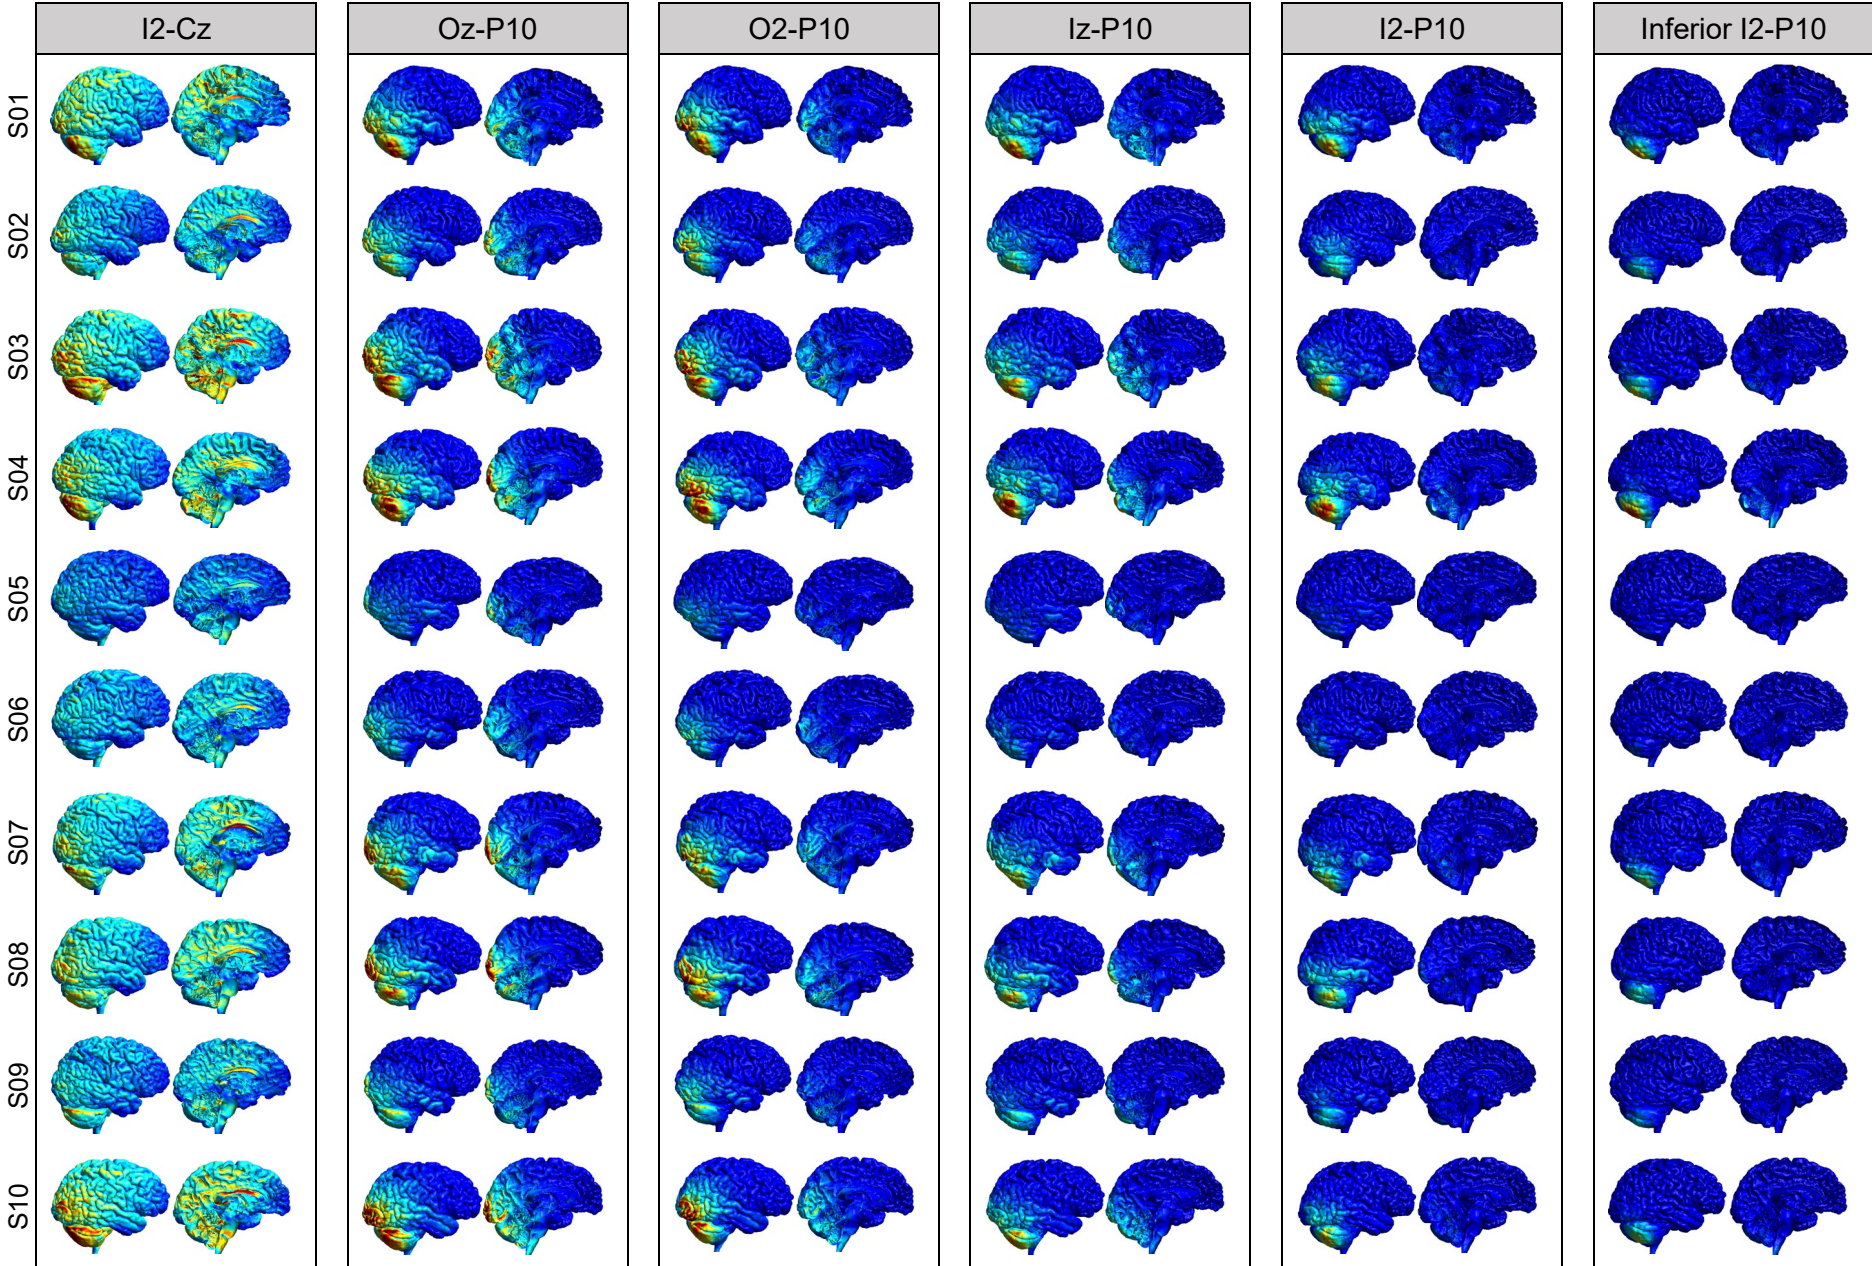

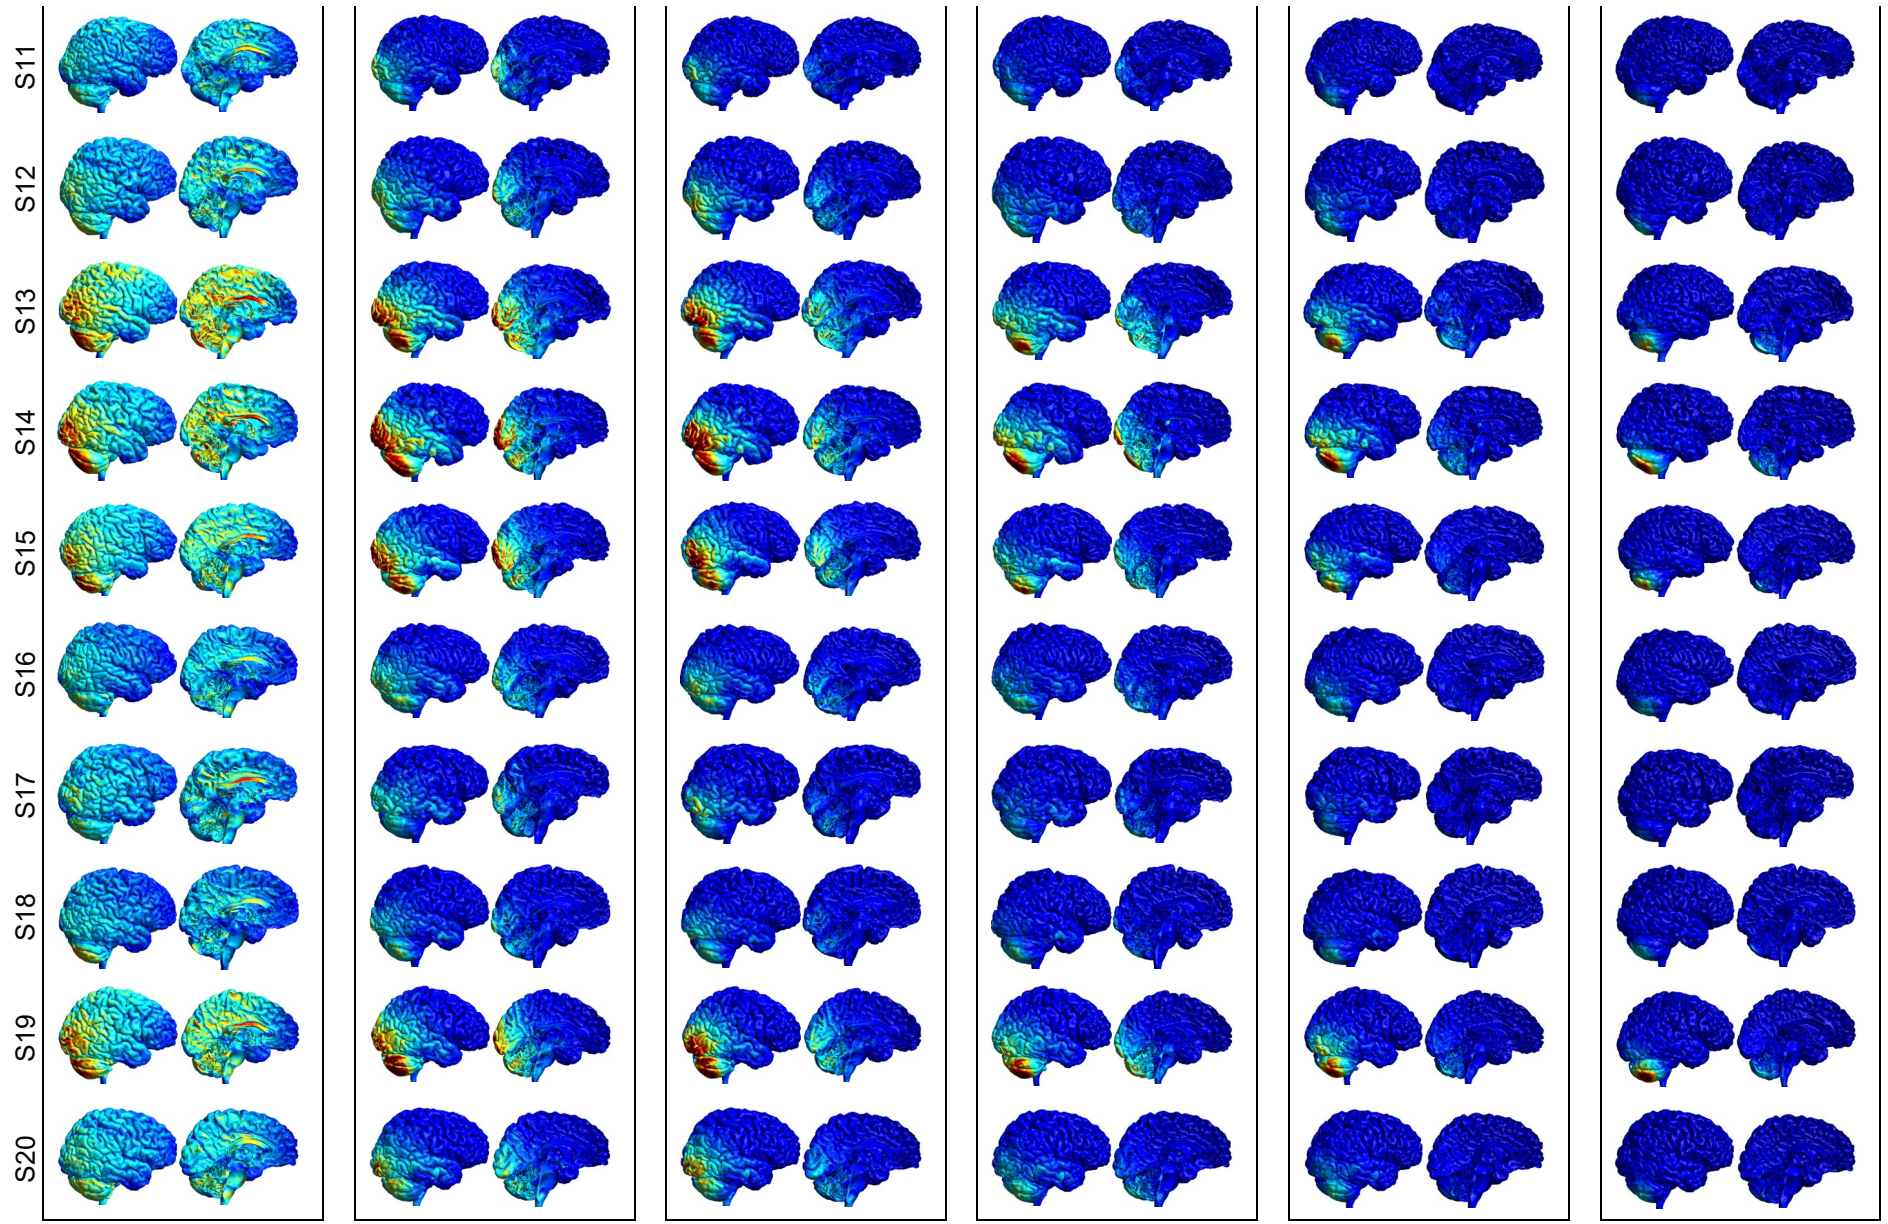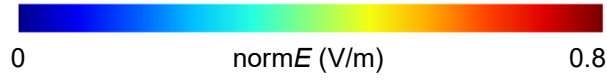

Figure S 4. Electric field directions for the six alternative montages tested in Experiment 2.

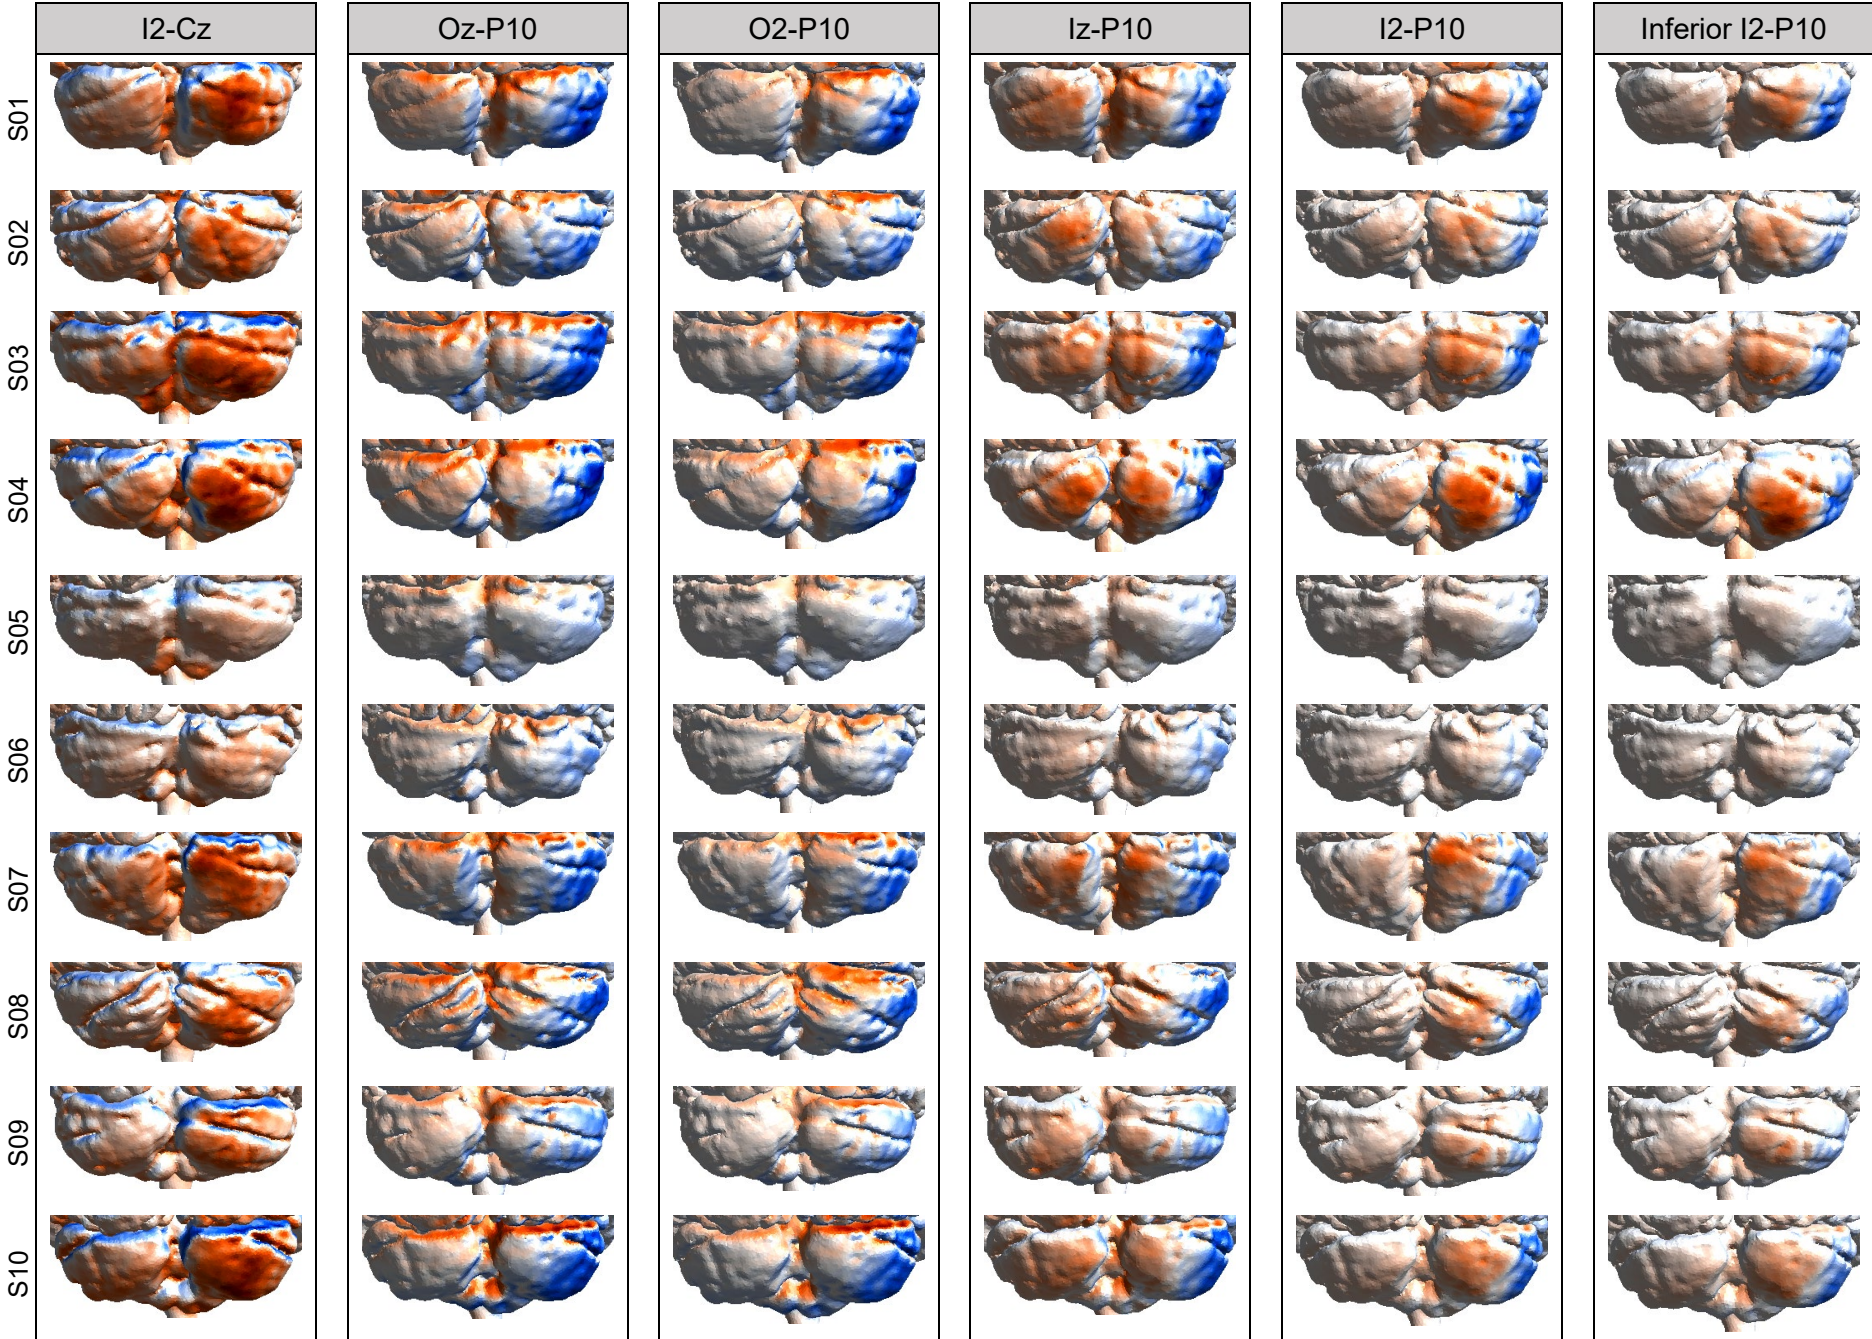

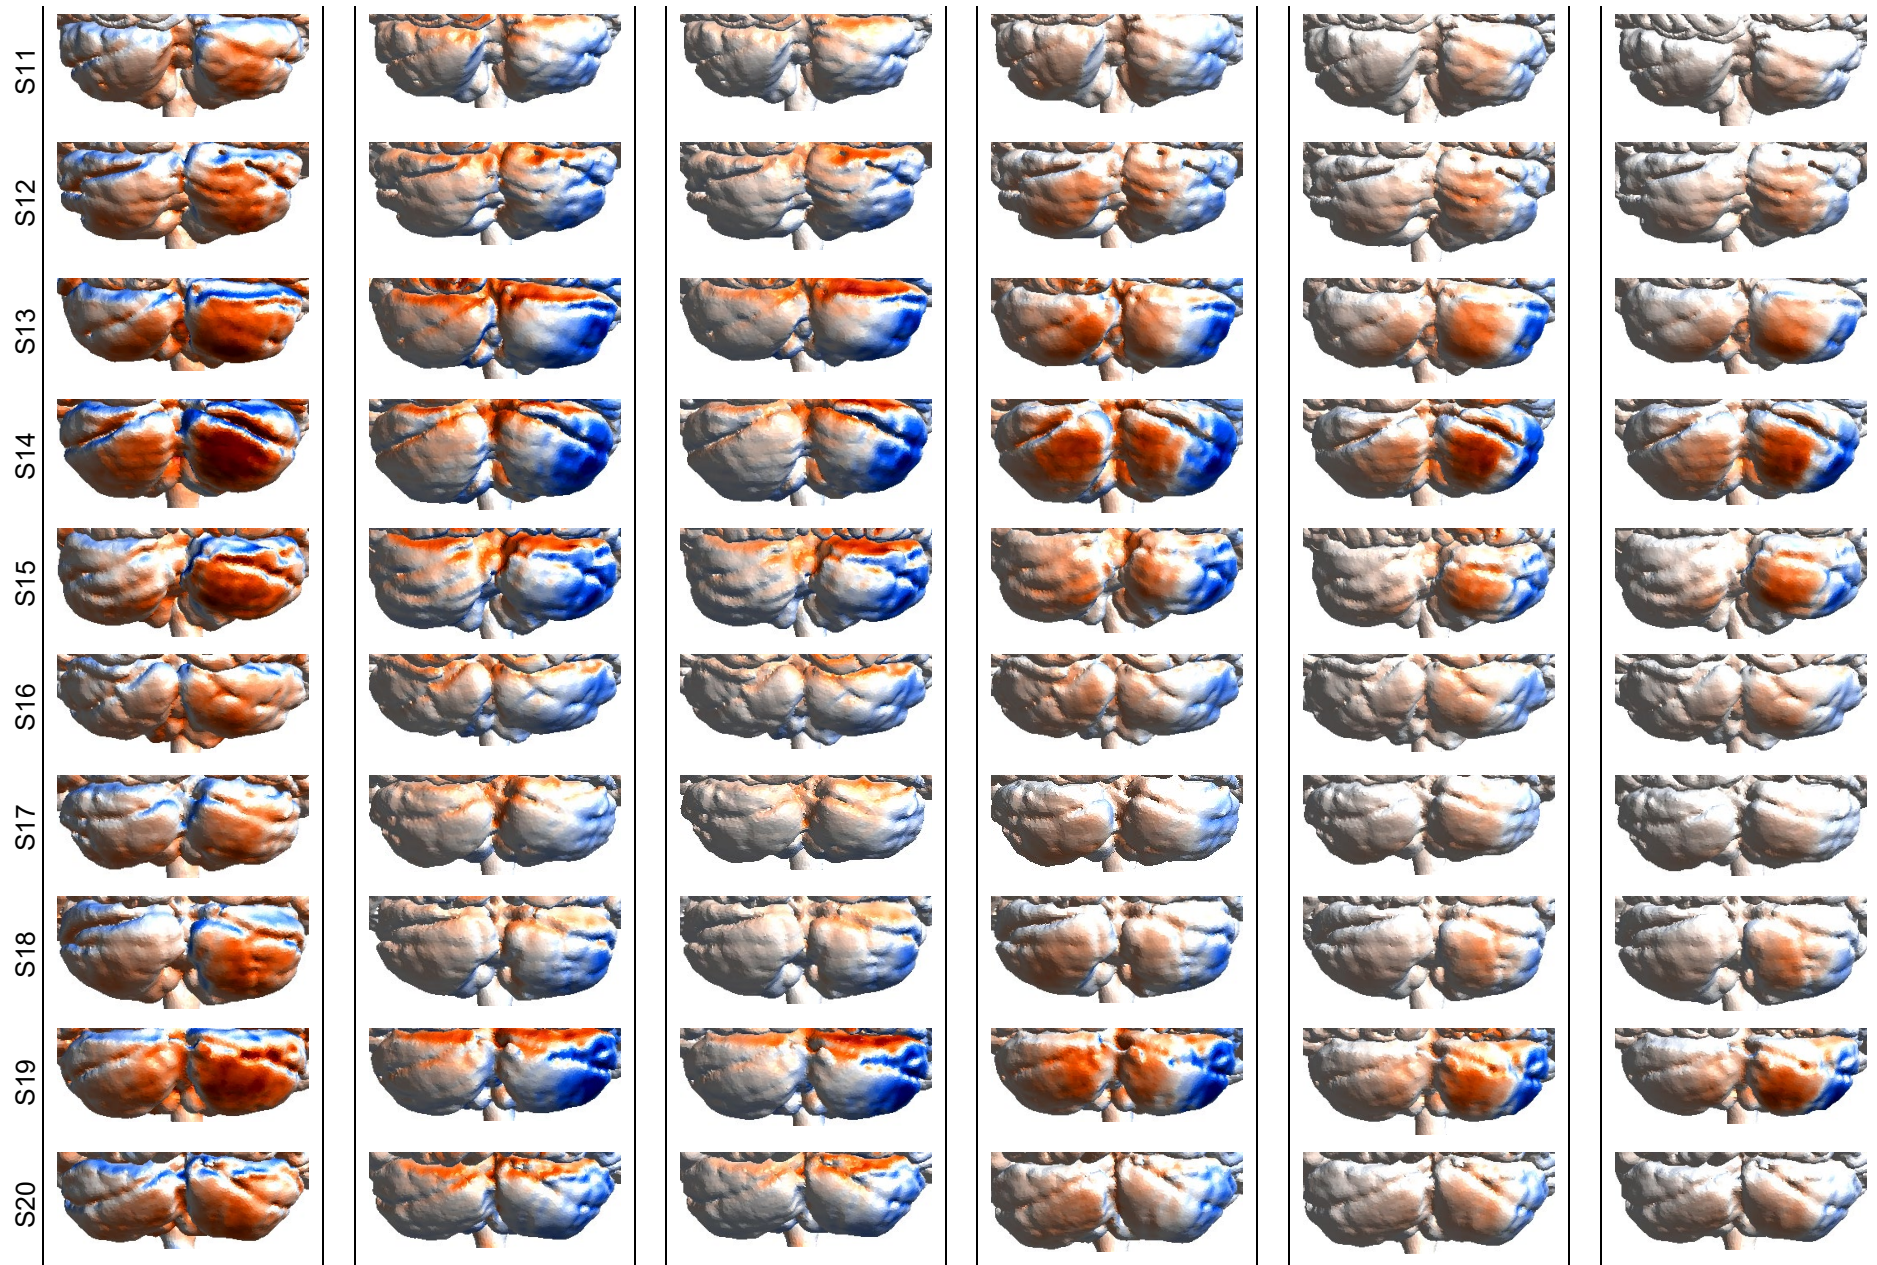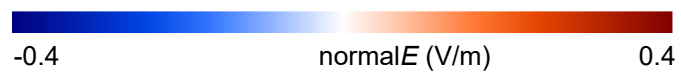



Figure S5. Field focality corresponding to the area of the grey matter with field strengths equal to or higher than 50% of the 99.9th percentile for all tested montages.

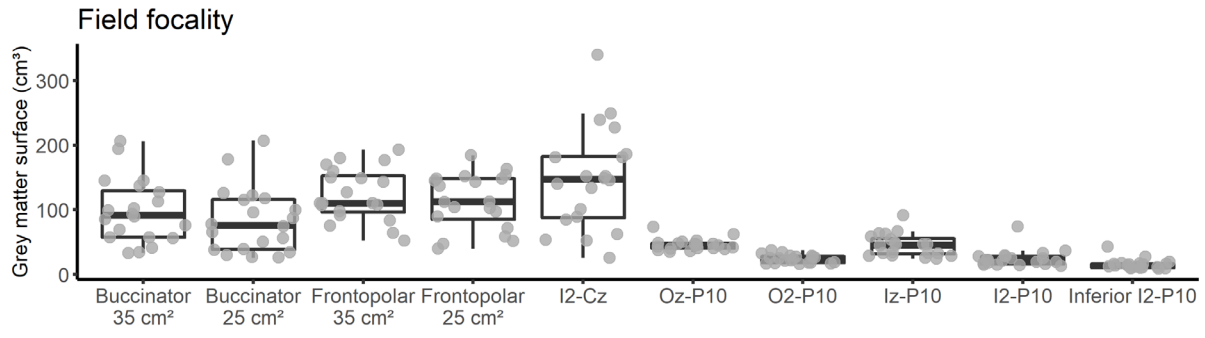

Supplement: 41598_2021_1755_MOESM1_ESM.pdf [file 41598_2021_1755_MOESM1_ESM.pdf]
